# Supplementary material for: Reducing depressive symptoms after the Great East Japan Earthquake in older survivors through group exercise participation and regular walking: a prospective observational study
Source: PubMed Central journal article supplement — BMJ Open. 2017 Mar 2;7(3):e013706. doi: 10.1136/bmjopen-2016-013706 (PMC5353320; doi:10.1136/bmjopen-2016-013706), 2017-03-02
Supplement: bmjopen-2016-013706supp_table1.pdf [file bmjopen-2016-013706supp_table1.pdf]

Supplementary Table 1. Relationship of exposure and covariate variables with change in Geriatric Depression Scale score (complete cases: n = 1,449)

|                                                           | n     | r      | P<br>(Pearson's correlation) |                      |
|-----------------------------------------------------------|-------|--------|------------------------------|----------------------|
| <b>Change in group exercise participation</b>             | 1,449 | -0.060 | 0.024                        |                      |
| <b>Change in walking habit</b>                            | 1,449 | -0.053 | 0.083                        |                      |
| <b>Age</b>                                                | 1,449 | 0.075  | 0.004                        |                      |
| <b>Educational attainment</b>                             | 1,449 | 0.039  | 0.143                        |                      |
| <b>Change in equivalent income</b>                        | 1,449 | -0.005 | 0.857                        |                      |
| <b>Change in IADL score</b>                               | 1,449 | -0.199 | <0.001                       |                      |
|                                                           | n     | Mean   | SD                           | P<br>(One-way ANOVA) |
| <b>Sex</b>                                                |       |        |                              |                      |
| Male                                                      | 827   | 0.1    | 2.6                          | 0.255                |
| Female                                                    | 622   | 0.0    | 2.6                          |                      |
| <b>Psychological disorder</b>                             |       |        |                              |                      |
| No                                                        | 1,441 | 0.1    | 2.6                          | 0.304                |
| Yes                                                       | 8     | -0.9   | 1.9                          |                      |
| <b>Disease status (other than psychological disorder)</b> |       |        |                              |                      |
| No disease                                                | 371   | 0.2    | 2.5                          | 0.418                |
| One or more disease(s)                                    | 1,078 | 0.0    | 2.6                          |                      |
| <b>Activities of daily living</b>                         |       |        |                              |                      |
| Maintain ADL                                              | 1,394 | 0.0    | 2.5                          | <0.001               |
| Impaired ADL after the                                    | 55    | 2.0    | 3.7                          |                      |
| <b>Change in drinking habit</b>                           |       |        |                              |                      |
| Drink. → Drink.                                           | 580   | 0.1    | 2.2                          | 0.055                |
| Non → Drink.                                              | 33    | -0.6   | 2.9                          |                      |
| Drink. → Non                                              | 122   | 0.5    | 3.0                          |                      |
| Non → Non                                                 | 714   | 0.0    | 2.7                          |                      |
| <b>Change in smoking habit</b>                            |       |        |                              |                      |
| Non → Non                                                 | 1,261 | 0.0    | 2.6                          | 0.001                |
| Smok. → Non                                               | 55    | 1.4    | 2.8                          |                      |
| Non → Smok.                                               | 7     | 0.9    | 3.6                          |                      |
| Smok. → Smok.                                             | 126   | -0.2   | 2.4                          |                      |
| <b>Change in job status</b>                               |       |        |                              |                      |
| Working → Working                                         | 196   | -0.3   | 2.2                          | 0.276                |
| No → Working                                              | 40    | 0.1    | 3.1                          |                      |
| Working → No                                              | 118   | 0.2    | 2.6                          |                      |
| No → No                                                   | 1,095 | 0.1    | 2.6                          |                      |
| <b>Dwelling house damage</b>                              |       |        |                              |                      |
| No damage                                                 | 627   | -0.1   | 2.5                          | 0.004                |
| Some damage                                               | 640   | 0.1    | 2.6                          |                      |
| Partial destruction                                       | 93    | 0.2    | 3.0                          |                      |
| Almost destruction                                        | 42    | 0.3    | 2.6                          |                      |
| Complete destruction                                      | 47    | 1.4    | 2.8                          |                      |
| <b>Lost family member(s)</b>                              |       |        |                              |                      |
| No                                                        | 1,079 | 0.1    | 2.6                          | 0.838                |
| Yes                                                       | 370   | 0.1    | 2.6                          |                      |

SD: standard deviation, ANOVA: analysis of variance, ADL: activities of daily living, IADL: instrumental activities of daily living.
