# Supplementary material for: Reducing depressive symptoms after the Great East Japan Earthquake in older survivors through group exercise participation and regular walking: a prospective observational study
Source: PubMed Central journal article supplement — BMJ Open. 2017 Mar 2;7(3):e013706. doi: 10.1136/bmjopen-2016-013706 (PMC5353320; doi:10.1136/bmjopen-2016-013706), 2017-03-02
Supplement: bmjopen-2016-013706supp_table2.pdf [file bmjopen-2016-013706supp_table2.pdf]

Supplementary Table 2. Multiple linear regression of changes in group exercise participation and walking habit (converted into Z-scores) with change in depressive symptoms by analyzing complete data set (n = 1,449)

|                                                            | Crude model |        |        |         |       |       | Model 1 |        |       |         |       | Model 2 |        |        |        |         | Model 3 |        |        |        |        |         |       |        |
|------------------------------------------------------------|-------------|--------|--------|---------|-------|-------|---------|--------|-------|---------|-------|---------|--------|--------|--------|---------|---------|--------|--------|--------|--------|---------|-------|--------|
|                                                            | B           | 95% CI |        | $\beta$ | t     | P     | B       | 95% CI |       | $\beta$ | t     | P       | B      | 95% CI |        | $\beta$ | t       | P      | B      | 95% CI |        | $\beta$ | t     | P      |
| <b>Change in group exercise participation</b>              | -0.139      | -0.276 | -0.002 | -0.056  | -1.99 | 0.047 | -0.125  | -0.261 | 0.010 | -0.051  | -1.82 | 0.069   | -0.112 | -0.241 | 0.017  | -0.045  | -1.71   | 0.088  | -0.052 | -0.187 | 0.083  | -0.021  | -0.75 | 0.453  |
| <b>Change in walking habit</b><br>(30.7 mins/day)          | -0.108      | -0.251 | 0.035  | -0.041  | -1.48 | 0.138 | -0.098  | -0.241 | 0.044 | -0.037  | -1.35 | 0.176   | -0.038 | -0.180 | 0.105  | -0.014  | -0.52   | 0.602  | -0.029 | -0.173 | 0.115  | -0.011  | -0.39 | 0.695  |
| <b>Age</b> (year)                                          |             |        |        |         |       |       | 0.033   | 0.008  | 0.057 | 0.070   | 2.59  | 0.010   | 0.011  | -0.017 | 0.039  | 0.023   | 0.75    | 0.455  | 0.009  | -0.019 | 0.037  | 0.020   | 0.66  | 0.507  |
| <b>Sex</b> (1 men, 2 women)                                |             |        |        |         |       |       | -0.127  | -0.394 | 0.141 | -0.024  | -0.93 | 0.353   | 0.006  | -0.326 | 0.338  | 0.001   | 0.03    | 0.973  | 0.004  | -0.327 | 0.336  | 0.001   | 0.03  | 0.979  |
| <b>Psychological disorder</b> (0 no, 1 yes)                |             |        |        |         |       |       |         |        |       |         |       |         | -1.131 | -2.666 | 0.403  | -0.033  | -1.45   | 0.148  | -1.088 | -2.588 | 0.411  | -0.031  | -1.42 | 0.155  |
| <b>Disease status</b> (0 no, 1 one or more)*               |             |        |        |         |       |       |         |        |       |         |       |         | -0.201 | -0.502 | 0.099  | -0.034  | -1.31   | 0.189  | -0.208 | -0.510 | 0.093  | -0.035  | -1.35 | 0.176  |
| <b>Educational attainment</b> (year)                       |             |        |        |         |       |       |         |        |       |         |       |         | 0.076  | 0.010  | 0.142  | 0.064   | 2.26    | 0.024  | 0.081  | 0.014  | 0.147  | 0.068   | 2.38  | 0.018  |
| <b>Impaired ADL</b> (0 no, 1 impaired)                     |             |        |        |         |       |       |         |        |       |         |       |         | 1.115  | 0.153  | 2.076  | 0.083   | 2.27    | 0.023  | 1.124  | 0.174  | 2.073  | 0.083   | 2.32  | 0.020  |
| <b>Changes in drinking habits</b>                          |             |        |        |         |       |       |         |        |       |         |       |         |        |        |        |         |         |        |        |        |        |         |       |        |
| Non→Drink.                                                 |             |        |        |         |       |       |         |        |       |         |       |         | -0.638 | -1.580 | 0.303  | -0.037  | -1.33   | 0.184  | -0.620 | -1.556 | 0.315  | -0.036  | -1.30 | 0.193  |
| Drink.→Non                                                 |             |        |        |         |       |       |         |        |       |         |       |         | 0.195  | -0.357 | 0.746  | 0.021   | 0.69    | 0.488  | 0.180  | -0.372 | 0.731  | 0.019   | 0.64  | 0.522  |
| Non→Non                                                    |             |        |        |         |       |       |         |        |       |         |       |         | -0.266 | -0.592 | 0.059  | -0.052  | -1.60   | 0.109  | -0.268 | -0.594 | 0.058  | -0.052  | -1.61 | 0.107  |
| <b>Changes in smoking habits</b>                           |             |        |        |         |       |       |         |        |       |         |       |         |        |        |        |         |         |        |        |        |        |         |       |        |
| Smoke.→Non                                                 |             |        |        |         |       |       |         |        |       |         |       |         | 1.127  | 0.435  | 1.819  | 0.084   | 3.19    | 0.001  | 1.117  | 0.431  | 1.803  | 0.083   | 3.19  | 0.001  |
| Non→Smoke.                                                 |             |        |        |         |       |       |         |        |       |         |       |         | 0.853  | -1.665 | 3.371  | 0.023   | 0.66    | 0.506  | 0.821  | -1.687 | 3.328  | 0.022   | 0.64  | 0.521  |
| Smoke.→Smoke.                                              |             |        |        |         |       |       |         |        |       |         |       |         | -0.234 | -0.690 | 0.222  | -0.026  | -1.01   | 0.315  | -0.226 | -0.676 | 0.225  | -0.025  | -0.98 | 0.326  |
| <b>Changes in job status</b>                               |             |        |        |         |       |       |         |        |       |         |       |         |        |        |        |         |         |        |        |        |        |         |       |        |
| No→Working                                                 |             |        |        |         |       |       |         |        |       |         |       |         | 0.484  | -0.502 | 1.470  | 0.031   | 0.96    | 0.336  | 0.450  | -0.536 | 1.436  | 0.029   | 0.90  | 0.371  |
| Working→No                                                 |             |        |        |         |       |       |         |        |       |         |       |         | 0.260  | -0.291 | 0.810  | 0.028   | 0.93    | 0.355  | 0.259  | -0.290 | 0.808  | 0.027   | 0.93  | 0.354  |
| No→No                                                      |             |        |        |         |       |       |         |        |       |         |       |         | 0.292  | -0.065 | 0.648  | 0.049   | 1.60    | 0.109  | 0.289  | -0.069 | 0.646  | 0.048   | 1.59  | 0.113  |
| <b>Dwelling house damage</b><br>(1 no damage → 5 complete) |             |        |        |         |       |       |         |        |       |         |       |         | 0.255  | 0.096  | 0.413  | 0.092   | 3.15    | 0.002  | 0.258  | 0.098  | 0.418  | 0.093   | 3.16  | 0.002  |
| <b>Death of family member(s)</b> (0 no, 1 yes)             |             |        |        |         |       |       |         |        |       |         |       |         | 0.085  | -0.223 | 0.394  | 0.014   | 0.54    | 0.588  | 0.097  | -0.212 | 0.405  | 0.016   | 0.61  | 0.539  |
| <b>Change in equivalent income</b> (million yen)           |             |        |        |         |       |       |         |        |       |         |       |         | -0.025 | -0.133 | 0.082  | -0.012  | -0.47   | 0.642  | -0.017 | -0.125 | 0.091  | -0.008  | -0.31 | 0.759  |
| <b>Change in IADL</b> (score)                              |             |        |        |         |       |       |         |        |       |         |       |         | -0.243 | -0.356 | -0.131 | -0.156  | -4.25   | <0.001 | -0.244 | -0.356 | -0.132 | -0.156  | -4.26 | <0.001 |
| <b>Interaction</b>                                         |             |        |        |         |       |       |         |        |       |         |       |         |        |        |        |         |         |        |        |        |        |         |       |        |
| Change in exercise x house damage                          |             |        |        |         |       |       |         |        |       |         |       |         |        |        |        |         |         |        | 0.200  | 0.017  | 0.383  | 0.061   | 2.14  | 0.032  |
| Change in walking time x house damage                      |             |        |        |         |       |       |         |        |       |         |       |         |        |        |        |         |         |        | 0.091  | -0.044 | 0.226  | 0.037   | 1.32  | 0.189  |

\* other than psychological disorder.

CI: confidence interval, ADL: activities of daily living, IADL: instrumental activities of daily living.
