# Supplementary material for: Reducing depressive symptoms after the Great East Japan Earthquake in older survivors through group exercise participation and regular walking: a prospective observational study
Source: PubMed Central journal article supplement — BMJ Open. 2017 Mar 2;7(3):e013706. doi: 10.1136/bmjopen-2016-013706 (PMC5353320; doi:10.1136/bmjopen-2016-013706), 2017-03-02
Supplement: bmjopen-2016-013706supp_table3.pdf [file bmjopen-2016-013706supp_table3.pdf]

Supplementary Table 3. Multiple linear regression of changes in group exercise participation and walking habit (converted into Z-scores) with change in depressive symptoms by analyzing multiply imputed data sets in older adults with or without depression (GDS  $\geq 5$  or  $< 5$ , respectively)

|                                                          | Baseline GDS $< 5$ (n = 2,299-2,309) |        |         |        |       | Baseline GDS $\geq 5$ (n = 1,029-1,039) |        |         |        |        |       |       |
|----------------------------------------------------------|--------------------------------------|--------|---------|--------|-------|-----------------------------------------|--------|---------|--------|--------|-------|-------|
|                                                          | B                                    | 95% CI | $\beta$ | t      | P     | B                                       | 95% CI | $\beta$ | t      | P      |       |       |
| <b>Crude model</b>                                       |                                      |        |         |        |       |                                         |        |         |        |        |       |       |
| Change in group exercise participation                   | -0.174                               | -0.260 | -0.088  | -0.057 | -3.97 | <0.001                                  | -0.263 | -0.600  | 0.073  | -0.086 | -1.54 | 0.125 |
| Change in walking habit                                  | -0.146                               | -0.250 | -0.041  | -0.050 | -2.73 | 0.006                                   | -0.260 | -0.470  | -0.049 | -0.089 | -2.42 | 0.016 |
| <b>Model 1</b>                                           |                                      |        |         |        |       |                                         |        |         |        |        |       |       |
| Change in group exercise participation                   | -0.155                               | -0.240 | -0.071  | -0.051 | -3.61 | <0.001                                  | -0.237 | -0.569  | 0.096  | -0.077 | -1.40 | 0.163 |
| Change in walking habit                                  | -0.139                               | -0.243 | -0.035  | -0.048 | -2.62 | 0.009                                   | -0.236 | -0.445  | -0.027 | -0.081 | -2.22 | 0.027 |
| <b>Model 2</b>                                           |                                      |        |         |        |       |                                         |        |         |        |        |       |       |
| Change in group exercise participation                   | -0.147                               | -0.229 | -0.066  | -0.048 | -3.54 | <0.001                                  | -0.195 | -0.532  | 0.141  | -0.064 | -1.14 | 0.255 |
| Change in walking habit                                  | -0.048                               | -0.147 | 0.051   | -0.016 | -0.94 | 0.345                                   | -0.119 | -0.325  | 0.087  | -0.041 | -1.13 | 0.257 |
| <b>Model 3</b>                                           |                                      |        |         |        |       |                                         |        |         |        |        |       |       |
| Change in group exercise participation                   | -0.135                               | -0.218 | -0.051  | -0.046 | -3.37 | 0.001                                   | -0.226 | -0.560  | 0.107  | -0.080 | -1.39 | 0.164 |
| Change in walking habit                                  | -0.037                               | -0.137 | 0.063   | -0.015 | -0.89 | 0.372                                   | -0.124 | -0.328  | 0.079  | -0.051 | -1.42 | 0.155 |
| Change in group exercise participation<br>x house damage | 0.046                                | -0.044 | 0.135   | 0.015  | 1.00  | 0.318                                   | 0.141  | -0.174  | 0.456  | 0.047  | 0.88  | 0.380 |
| Change in walking habit<br>x house damage                | 0.063                                | -0.030 | 0.156   | 0.022  | 1.32  | 0.187                                   | 0.179  | -0.035  | 0.394  | 0.062  | 1.64  | 0.101 |

Z-scores of 1.0 mean 44.5 days/year in the change in frequency of group exercise participation and 30.7 mins/day in the change in daily walking time.

Model 1: crude model + age and sex

Model 2: model 1 + psychological disorder, disease status, educational attainment, impaired activities of daily living, dwelling house damage, death of family members, changes in drinking habits, smoking habits, job status, equivalent income, and instrumental activities of daily living score.

Model 3: model 2 + interaction terms

GDS: Geriatric Depression Scale, CI: confidence interval.
